# Supplementary material
Source: PubMed Central journal article supplement (PMC515081)
Supplement: pnas_101_34_12444__1.pdf [file pnas_101_34_12444__1.pdf]

**Table 1. Diffraction data and refinement statistics**

|                                  | Native 12Y-1       | LAH 12Y-1          | PHR 12Y-1          | Native 12Y-2                                  |
|----------------------------------|--------------------|--------------------|--------------------|-----------------------------------------------|
| Diffraction data                 |                    |                    |                    |                                               |
| Space group                      | I4 <sub>1</sub> 22 | I4 <sub>1</sub> 22 | I4 <sub>1</sub> 22 | I2 <sub>1</sub> 2 <sub>1</sub> 2 <sub>1</sub> |
| Unit cell, Å ( <i>a,b,c</i> )    | 97.26,97.26,65.23  | 97.97,97.97,65.61  | 97.60,97.60,65.27  | 65.28,92.05,98.22                             |
| Resolution, Å*                   | 69–2.8 (2.9–2.8)   | 20–3.0 (3.11–3.0)  | 20–2.5 (2.6–2.5)   | 67.4–2.18 (2.24–2.18)                         |
| Measured reflections             | 60,022             | 42,615             | 48,364             | 99,606                                        |
| Unique reflections               | 3,975              | 3,304              | 5,472              | 15,764                                        |
| Multiplicity                     | 15.1 (4.3)         | 12.9 (8.3)         | 8.8 (5.0)          | 6.6 (6.3)                                     |
| Completeness, %                  | 99 (94.3)          | 97.2 (82.5)        | 96 (77)            | 100 (99.4)                                    |
| $\langle I/\sigma(I) \rangle$    | 18.1 (1.8)         | 18.4 (1.8)         | 8.6 (1.5)          | 32.5 (4.0)                                    |
| $\langle \chi^2 \rangle$         | 1.21 (1.10)        | 1.74 (1.60)        | 1.09 (1.40)        | 1.19 (0.95)                                   |
| $R_{\text{merge}}, \%^\dagger$   | 4.5                | 10.2               | 10.0               | 5.4                                           |
| Refinement                       |                    |                    |                    |                                               |
| Resolution range, Å              | 6.0–2.82           |                    |                    | 18.12–2.18                                    |
| $R, \%^\ddagger$                 | 16.6 (33.9)        |                    |                    | 17.6 (22.5)                                   |
| $R_{\text{free}}, \%^\ddagger$   | 25.4 (54.3)        |                    |                    | 24.7 (31.1)                                   |
| RMS deviations:                  |                    |                    |                    |                                               |
| Bond length, Å                   | 0.012              |                    |                    | 0.012                                         |
| Bond angles, °                   | 1.5                |                    |                    | 1.5                                           |
| Average B values, Å <sup>2</sup> | 40.2               |                    |                    | 21.3                                          |

\*Values in parentheses are for the highest shell.

$^\dagger R_{\text{merge}} = \sum hkl \sum j |I_j - \langle I_j \rangle| / \sum hkl \sum j |I_j|$ , where *hkl* specifies unique indices, *j* indicates equivalent observations of *hkl*, and  $\langle I_j \rangle$  is the mean value.

$^\ddagger R = \sum hkl ||F_o| - |F_c|| / \sum hkl |F_o|$ , where  $|F_o|$  and  $|F_c|$  are the observed and calculated structure factor amplitudes, respectively.
