# Supplementary material
Source: PubMed Central journal article supplement (PMC515081)
Supplement: pnas_101_34_12444__4.pdf [file pnas_101_34_12444__4.pdf]

**Table 2. Dimer interactions**

| Interface*                         | Hydrogen bonds                     | Hydrogen bond distance, Å <4 Å |         |       |
|------------------------------------|------------------------------------|--------------------------------|---------|-------|
|                                    |                                    | 12Y-2 A                        | 12Y-2 B | 12Y-1 |
| D-D <sub>s</sub> strands           | Main-chain H-bonds:                |                                |         |       |
|                                    | Val59(N)–Val59(O) <sub>s</sub>     | 2.88                           | 2.93    | 3.15  |
|                                    | Val59(O)–Val59(N) <sub>s</sub>     | 2.88                           | 2.93    | 3.15  |
|                                    | Side-chain H-bonds:                |                                |         |       |
|                                    | Lys61(Nζ)–Glu57(Oε1) <sub>s</sub>  | 2.65                           |         | 3.16  |
|                                    | Water mediated H-bonds:            |                                |         |       |
|                                    | W(20)/W(37)–Lys61(N)               | 3.37                           | 3.12    |       |
|                                    | W(20)/W(37)–Gly62(N)               | 3.09                           | 2.64    |       |
|                                    | W(20)/W(37)–Glu57(O) <sub>s</sub>  | 2.73                           | 2.88    |       |
|                                    | W(20)/W(37)–Glu57(N) <sub>s</sub>  | 2.75                           | 2.92    |       |
|                                    | W(1)/W(11)–Glu57(Oε1) <sub>s</sub> | 2.96                           | 2.66    |       |
|                                    | W(1)/W(11)–Lys61(N)                | 2.81                           | 3.00    |       |
|                                    | W(1)/W(11)–Val59(O)                | 2.81                           | 3.13    |       |
|                                    | W(81)–Thr58(Oγ1)                   |                                |         | 3.01  |
|                                    | W(81)–Asn60(Oδ1) <sub>s</sub>      |                                |         | 3.13  |
| CDR3-CDR3 <sub>s</sub>             | Main-chain H-bonds:                |                                |         |       |
|                                    | Asn95(N)–Arg101(O) <sub>s</sub>    | 3.25                           | 3.05    |       |
|                                    | Arg101(N)–Asn95(O) <sub>s</sub>    | 3.25                           | 3.05    |       |
|                                    | Ser97(N)–Leu99(O) <sub>s</sub>     | 2.90                           | 3.11    |       |
|                                    | Ser97(O)–Leu99(N) <sub>s</sub>     | 3.09                           | 2.74    |       |
|                                    | Side-chain H-bonds:                |                                |         |       |
|                                    | Asn95(Oδ1)–Arg101(Nε) <sub>s</sub> | 2.72                           |         |       |
| Tyr94(O)–Arg101(Nε) <sub>s</sub>   |                                    | 2.69                           |         |       |
| Tyr94(Oη)–Arg101(Nη1) <sub>s</sub> |                                    | 3.36                           |         |       |
| CDR1-CDR1 <sub>s</sub>             | Side-chain H-bonds:                |                                |         |       |
|                                    | Lys 32(O)–Asp33(Oδ1) <sub>s</sub>  | 2.42                           | 3.25    |       |
|                                    | Lys 32(O)–Lys61(Nζ) <sub>s</sub>   |                                | 2.84    |       |

\*Subscript “s” is for a twofold symmetry-related molecule.
