# Supplementary material
Source: PubMed Central journal article supplement (PMC515081)

*a*

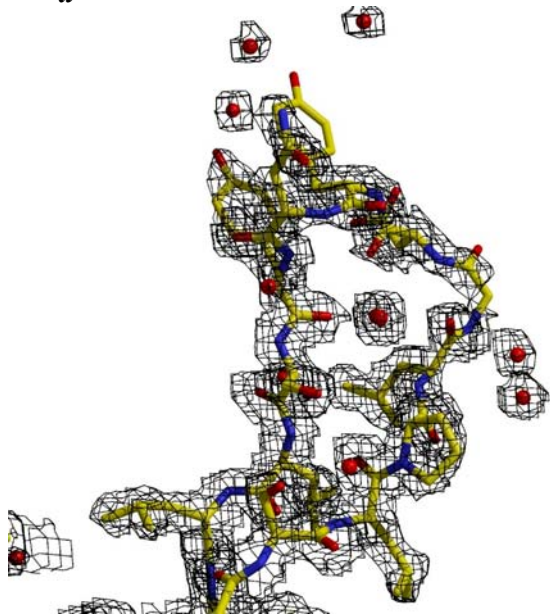

*b*

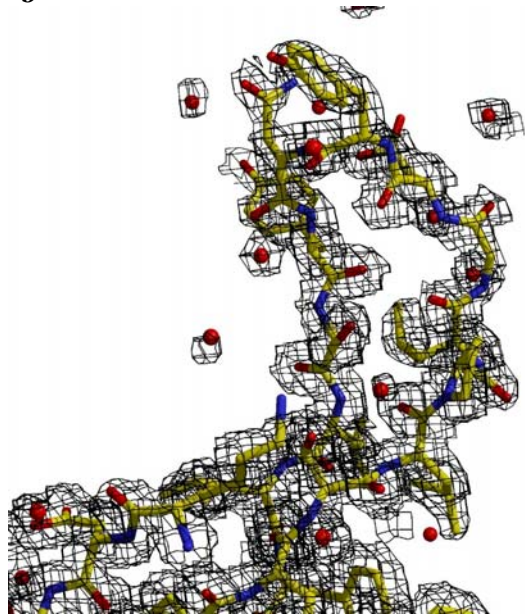

Supplement: pnas_101_34_12444__2.pdf [file pnas_101_34_12444__2.pdf]

**a**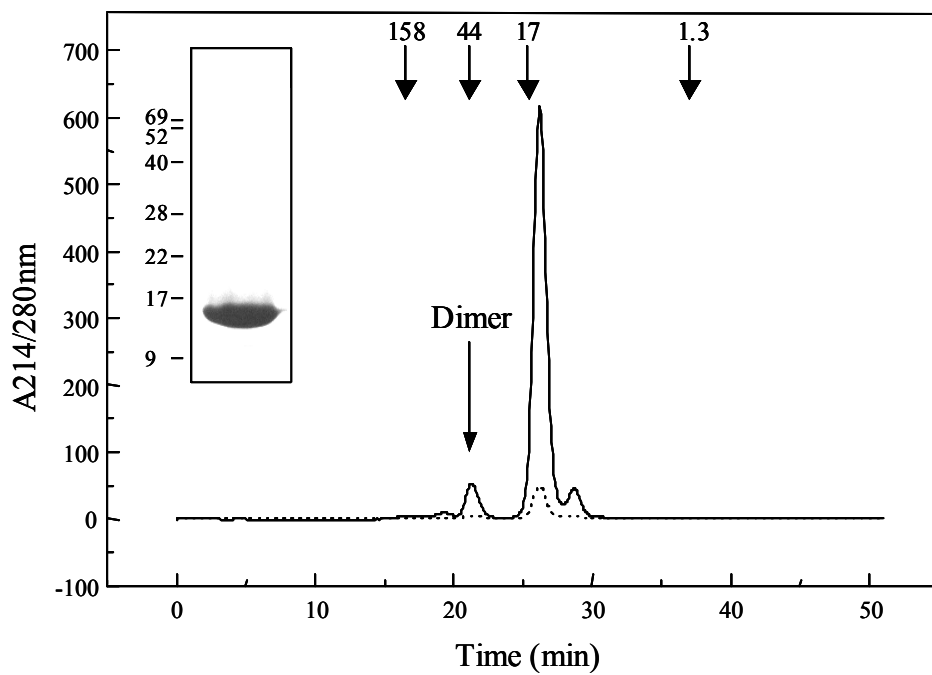**b**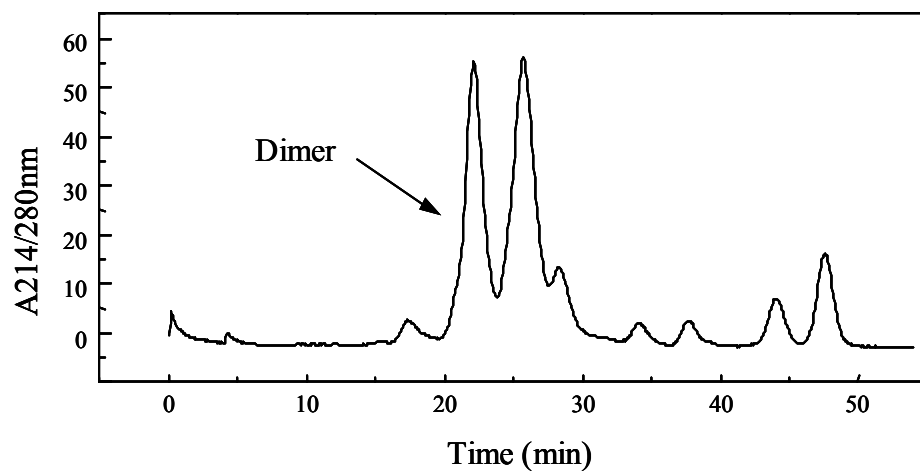**c**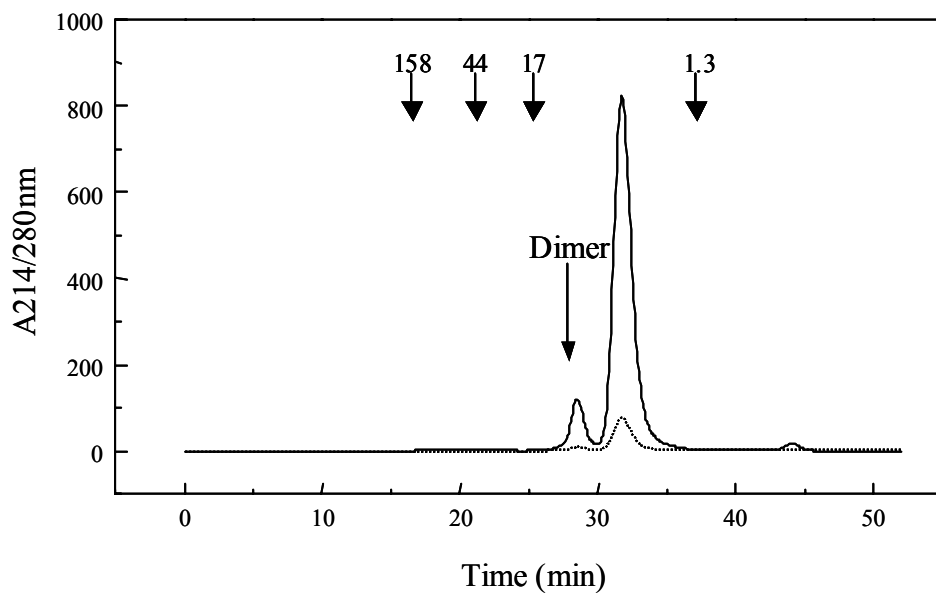

Supplement: pnas_101_34_12444__5.pdf [file pnas_101_34_12444__5.pdf]
